# Supplementary material for: Copeptin in acute decompensation of liver cirrhosis: relationship with acute-on-chronic liver failure and short-term survival
Source: Springer Nature journal article supplement (doi:10.1186/s13054-017-1894-8), 2017-12-01
Supplement: MOESM3 [file 15327360]

**Supplementary table 3.** Consecutive serum copeptin concentrations.

| <b>Serum copeptin (pmol/L)</b>                                      |                  |                  |                  |                  |
|---------------------------------------------------------------------|------------------|------------------|------------------|------------------|
| <b>Group*</b>                                                       | <b>Day 0-2</b>   | <b>Day 3-7</b>   | <b>Day 8-14</b>  | <b>Day 22-28</b> |
| <b>Patients with a sample at day 0-2 (n=779)</b>                    | 13.3 (4.7-31.9)  | n.a.             | n.a.             | n.a.             |
| <b>Patients with a sample at day 0-2 and 3-7 (n=179)</b>            | 26.6 (7.8-53.4)  | 21.0 (9.0-41.8)  | n.a.             | n.a.             |
| <b>Patients with a sample at day 0-2 till 8-14 (n=85)</b>           | 30.3 (10.9-62.7) | 24.9 (12.1-49.9) | 23.6 (14.3-43.8) | n.a.             |
| <b>Patients with a sample at day 0-2 till 8-14 and 22-28 (n=38)</b> | 31.3 (5.9-62.7)  | 23.9 (12.1-49.9) | 22.5 (17.1-43.8) | 27.3 (12.9-70.6) |

n.a., not applicable

\*Only 12 patients had a sample available at 15-21 days after hospital admission (data not shown).

Serum copeptin concentration are expressed in pmol/L as median and interquartile range.
