# Supplementary material for: Copeptin in acute decompensation of liver cirrhosis: relationship with acute-on-chronic liver failure and short-term survival
Source: Springer Nature journal article supplement (doi:10.1186/s13054-017-1894-8), 2017-12-01
Supplement: MOESM6 [file 15327360]

**Supplementary table 6.** Parameters associated with 28-day survival in a population of 779 patients admitted for acute decompensation of cirrhosis. Univariate analysis.

| Variable                        | Mortality at 28 days |                | p-value |
|---------------------------------|----------------------|----------------|---------|
|                                 | Survivors<br>(n=692) | Dead<br>(n=63) |         |
| Age (years)                     | 58±12                | 59±9           | 0.157   |
| Gender (male), n (%)            | 452 (65.3)           | 39 (61.9)      | 0.505   |
| <b>Physical exam</b>            |                      |                |         |
| SBP (mmHg)                      | 116±18               | 118±19         | 0.324   |
| DBP (mmHg)                      | 67±11                | 65±10          | 0.235   |
| MAP (mmHg)                      | 83±12                | 82±12          | 0.538   |
| <b>Clinical features, n (%)</b> |                      |                |         |
| Ascites                         | 606 (87.6)           | 62 (98.4)      | 0.011   |
| Bacterial infection             | 152 (22.1)           | 20 (31.8)      | 0.067   |
| SIRS                            | 124 (17.9)           | 24 (38.1)      | <0.001  |
| Sepsis                          | 28 (4.1)             | 7 (11.1)       | 0.010   |
| HE                              | 197 (28.5)           | 33 (52.4)      | <0.001  |
| <b>Organ failures, n (%)</b>    |                      |                |         |
| Liver                           | 66 (9.5)             | 24 (38.1)      | <0.001  |
| Cerebral                        | 27 (3.9)             | 10 (15.9)      | <0.001  |
| Circulatory                     | 14 (2.0)             | 6 (9.5)        | <0.001  |
| Respiratory                     | 9 (1.3)              | 3 (4.8)        | 0.033   |
| Renal                           | 62 (9.0)             | 18 (28.6)      | <0.001  |
| Coagulation                     | 31 (4.5)             | 9 (14.3)       | 0.001   |
| <b>Laboratory data</b>          |                      |                |         |
| Copeptin (pmol/L)               | 12 (4-28)            | 39 (18-68)     | <0.001  |
| WBC (x 10 <sup>9</sup> /L)      | 5.7 (4.0-8.8)        | 9.0 (6.3-13.3) | <0.001  |
| CRP (mg/L)                      | 16 (6-38)            | 32 (18-58)     | 0.016   |
| Bilirubin (mg/dL)               | 2.7 (1.5-5.7)        | 6.2 (2.7-19.7) | <0.001  |
| Prothrombine time (s)           | 18 (15-24)           | 22 (17-26)     | 0.026   |
| INR                             | 1.4 (1.3-1.7)        | 1.8 (1.5-2.3)  | <0.001  |
| Creatinine (mg/dL)              | 0.9 (0.7-1.3)        | 1.3 (0.8-2.5)  | <0.001  |
| Sodium (mmol/L)                 | 135±5                | 133±8          | 0.001   |
| <b>Scores</b>                   |                      |                |         |
| Child-Pugh                      | 9.2±2.0              | 11.2±1.9       | <0.001  |
| MELD                            | 17±6                 | 25±8           | <0.001  |
| CLIF-C OF                       | 7±1                  | 9±3            | <0.001  |

SBP, systolic blood pressure, DBP, diastolic blood pressure; MAP, mean arterial blood pressure; SIRS, systemic inflammatory response syndrome; HE: hepatic encephalopathy; WBC: white blood cell count; CRP: C-reactive protein; INR: international normalized ratio; MELD: Model for End-stage Liver Disease; CLIF-C OF: CLIF-Consortium Organ Failure Score.

Variables are expressed as mean ± SD, median (IQR) or numbers and percentage.

24 transplanted patients were considered as a secondary event.
